# Supplementary material
Source: PubMed Central journal article supplement (PMC3173073)
Supplement: supp_M111.238147_jbc.M111.238147-1.pdf [file supp_M111.238147_jbc.M111.238147-1.pdf]

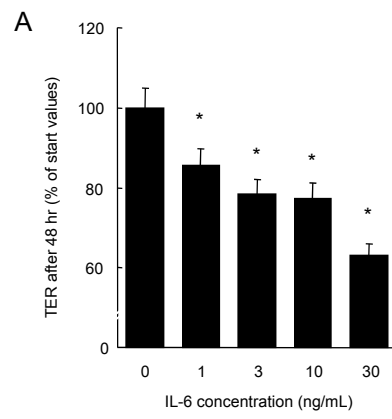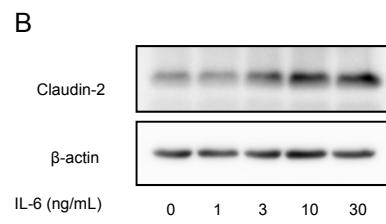

Fig. S1

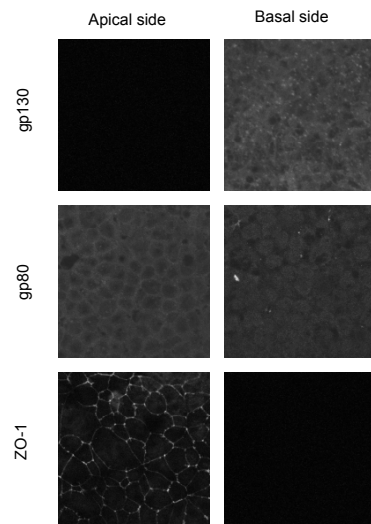

Fig. S2



## SUPPLEMENTAL FIGURE LEGENDS

***Fig. S1* IL-6 increases TJ permeability and claudin-2 expression in T84 cell monolayers.** (A) TER was measured across T84 cell monolayers incubated with varying concentrations of IL-6 (0~30 ng/mL) for 48 hr. (B) Whole cell extracts of T84 cell monolayers incubated with varying concentrations of IL-6 (0~30 ng/mL) for 48 hr were immunoblotted for claudin-2 and  $\beta$ -actin. \* $P < 0.05$  relative to the control value. Values represent the mean  $\pm$  SEM (n = 4).

***Fig. S2* Localization of gp130 and gp80 differ in Caco-2 cell monolayers.** Caco-2 cells fixed with methanol were immunolabeled for gp130, gp80, and ZO-1 and the apical and basal images of cell monolayers were collected by confocal microscopy.

***Fig. S3.* Sequence analysis of the 5'-flanking region of the human claudin-2 gene.** Potential binding sites are underlined.

Table S1. Primers used in quantitative RT-PCR

| Target gene      | Forward                     | Reverse                       |
|------------------|-----------------------------|-------------------------------|
| hClaudin-2       | 5'-CTCCCTGGCCTGCATTATCTC-3' | 5'-ACCTGCTACCGCCACTCTGT-3'    |
| hCdx-1           | 5'-TCGGACCAAGGACAAGTACC-3'  | 5'-GATCTTCACCTGCCGTTTACAG-3'  |
| hCdx-2           | 5'-CAGTCGCTACATCACCATCC-3'  | 5'-TTTCCTCTCCTTTGCTCTGC-3'    |
| h $\beta$ -actin | 5'-GCCGAGGACTTTGATTGCA-3'   | 5'-CTTCCTGTAAACAACGCATCTCA-3' |

Table S2. Primers used to delete transcriptional factor binding sites in site-directed mutagenesis of claudin-2 promoter

| Deletion target | Forward                       | Reverse                          |
|-----------------|-------------------------------|----------------------------------|
| Cdx-A           | 5'-AAGATAACAAAGGTCAAAGGC-3'   | 5'-AACACATGAGAAAGGAAAAAAAAAAC-3' |
| Cdx-B           | 5'-GTTTCTCATAAGCTTCTGGTC-3'   | 5'-CGCTGGATGCCTTTTGACC-3'        |
| Cdx-C/D         | 5'-TCTTCTAGATGCCTTCTTGAG-3'   | 5'-CAGATTAAATATTGACCAGAAGC-3'    |
| STAT            | 5'-AGCAGCCACCTGTCTGGCTCCTG-3' | 5'-GGTGATGATGGCAGTGGTGGTTG-3'    |
| NFκB            | 5'-GGGCCCCCTCTCAGTCCTGG-3'    | 5'-TGGGCCATCTGTTAGGGGGG-3'       |
